# Landscape of DNA Methylation on the Marsupial X

Shafagh A. Waters,<sup>†,1</sup> Alexandra M. Livernois,<sup>2</sup> Hardip Patel,<sup>3</sup> Denis O’Meally,<sup>4</sup> Jeff M. Craig,<sup>5,6</sup> Jennifer A. Marshall Graves,<sup>7</sup> Catherine M. Suter,<sup>8,9</sup> and Paul D. Waters<sup>\*,1</sup>

<sup>1</sup>School of Biotechnology & Biomolecular Sciences, Faculty of Science, University of New South Wales, Sydney, NSW, Australia

<sup>2</sup>Institute for Applied Ecology, University of Canberra, Canberra, ACT, Australia

<sup>3</sup>John Curtin School of Medical Research, Australian National University, Canberra, ACT, Australia

<sup>4</sup>Center for Gene Therapy, Beckman Research Institute of the City of Hope, Duarte, CA

<sup>5</sup>Early Life Epigenetics, Murdoch Childrens Research Institute, Royal Children’s Hospital, Parkville, VIC, Australia

<sup>6</sup>Department of Paediatrics, University of Melbourne, Parkville, Victoria 3052, Australia

<sup>7</sup>School of Life Science, La Trobe University, Melbourne, VIC, Australia

<sup>8</sup>Division of Molecular Structural and Computational Biology, Victor Chang Cardiac Research Institute, Darlinghurst, NSW, Australia

<sup>9</sup>Faculty of Medicine, University of New South Wales, Sydney, NSW, Australia

<sup>†</sup>Present address: School of Women’s and Children’s Health, Faculty of Medicine, University of New South Wales, Sydney, NSW, Australia

\*Corresponding author: E-mail: p.waters@unsw.edu.au.

Associate editor: John Parsch

## Abstract

DNA methylation plays a key role in maintaining transcriptional silence on the inactive X chromosome of eutherian mammals. Beyond eutherians, there are limited genome wide data on DNA methylation from other vertebrates. Previous studies of X borne genes in various marsupial models revealed no differential DNA methylation of promoters between the sexes, leading to the conclusion that CpG methylation plays no role in marsupial X-inactivation. Using reduced representation bisulfite sequencing, we generated male and female CpG methylation profiles in four representative vertebrates (mouse, gray short-tailed opossum, platypus, and chicken). A variety of DNA methylation patterns were observed. Platypus and chicken displayed no large-scale differential DNA methylation between the sexes on the autosomes or the sex chromosomes. As expected, a metagene analysis revealed hypermethylation at transcription start sites (TSS) of genes subject to X-inactivation in female mice. This contrasted with the opossum, in which metagene analysis did not detect differential DNA methylation between the sexes at TSSs of genes subject to X-inactivation. However, regions flanking TSSs of these genes were hypomethylated. Our data are the first to demonstrate that, for genes subject to X-inactivation in both eutherian and marsupial mammals, there is a consistent difference between DNA methylation levels at TSSs and immediate flanking regions, which we propose has a silencing effect in both groups.

**Key words:** X chromosome inactivation, mammal, differential methylation, sex chromosomes, evolution, genomics.

## Introduction

In therian (eutherian and marsupial) mammals, females have two copies of the X chromosome, one of which is transcriptionally silenced in somatic cells by an epigenetic process called X chromosome inactivation (XCI). Methylation of cytosine (5-methylcytosine—5mC) is an epigenetic modification associated with gene silencing on the X chromosome in eutherian mammals, where it is established relatively late on the inactive X chromosome (Xi) (Lock et al. 1987) and is essential for long-term maintenance of the XCI state (Mohandas et al. 1981; Graves 1982).

Eutherian XCI is facilitated by a noncoding RNA (ncRNA), called *XIST*, which is expressed from and spreads in *cis* along the nascent Xi (reviewed in Augui et al. 2011). *Xist* RNA interacts with a host of proteins, including epigenetic modifiers (Chu et al. 2015; McHugh et al. 2015; Minajigi et al. 2015) that mediate a cascade of epigenetic changes on the Xi including histone modifications, incorporation of variant

histones, and ultimately DNA methylation of promoter-associated CpG islands (Lock et al. 1986; Norris et al. 1991; Tribioli et al. 1992; Escamilla-Del-Arenal et al. 2011).

XCI also occurs in marsupials, but in contrast to eutherians there is no *Xist* gene (Duret et al. 2006; Hore et al. 2007). Instead *Rsx* (RNA on the silent X), a noncoding RNA with *Xist*-like properties, is expressed exclusively from the nascent Xi to mediate its silencing (Grant et al. 2012). The marsupial Xi is characterized by a suite of histone modifications and variants that is similar, but not identical, to those observed on the eutherian Xi (Mahadevaiah et al. 2009; Rens et al. 2010; Chaumeil et al. 2011; Wang et al. 2014). The relevance of DNA methylation in marsupial XCI is poorly understood, a consequence of the limited number of genes analyzed and disparate species examined (Kaslow and Migeon 1987; Loebel and Johnston 1996; Wang et al. 2014).

Immunofluorescence studies labeling for 5mC demonstrated hypomethylation of the Xi compared with the active X (Xa) in marsupials (Rens et al. 2010; Ingles and Deakin 2015),

a counterintuitive result considering the correlation between DNA hypermethylation and gene silencing (reviewed in Jones 2012). CpGs associated with intragenic regions of *Hprt* in the common wallaroo (*Macropus robustus*), and *G6pd* in *Didelphis virginiana*, were shown to be hypermethylated in vivo on the Xa, but no correlation with expression was observed (Piper et al. 1993). With the exception of CpG dinucleotides associated with the *Rsx* promoter, which are differentially methylated on the maternally and paternally derived X chromosomes (Wang et al. 2014), CpG islands associated with promoters of 27 genes show no differential DNA methylation between Xi and Xa (Kaslow and Migeon 1987; Loebel and Johnston 1996; Hornecker et al. 2007; Wang et al. 2014). These observations, which contrast Xi methylation in eutherians, led to the prevailing view that DNA methylation at promoters is not involved in marsupial XCI.

Platypus (a monotreme mammal) has a complex sex chromosome system in which males have five Xs and five Ys, and females have five pairs of Xs. This system shares no homology with therian sex chromosomes (Veyrunes et al. 2008); instead it shares considerable homology (especially X<sub>5</sub>) with the bird ZW sex chromosome system (Grützner et al. 2004; Rens et al. 2007). Partial inactivation of X/Z-linked loci was observed in the homogametic sex of both platypus and chicken (Deakin et al. 2008; Livernois et al. 2013), analogous to the partial inactivation of genes on therian X chromosomes (Al Nadaf et al. 2010, 2012). Characterization of DNA methylation in monotremes is limited to one study using immunofluorescence (Rens et al. 2010), where no differential methylation was observed between X chromosomes at metaphase in female platypus. In chicken, there has been little focus on global Z chromosome DNA methylation, instead attention has centered on the male hypermethylated region (Teranishi et al. 2001; Itoh et al. 2011; Yang et al. 2016), or the genome more broadly (Li et al. 2011, 2015).

A comparative analysis of the DNA methylation landscape on X or Z chromosomes in phylogenetically informative species is key to our broader understanding of dosage compensation. Here, we use reduced representation bisulfite sequencing (RRBS) to examine the patterns of CpG methylation on sex chromosomes in representative species from extant mammalian lineages (eutherians, marsupials, and monotremes) and a bird. In platypus and chicken, we find no differential DNA methylation on sex chromosomes between the sexes, indicating that 5mC plays no global role in sex chromosome gene silencing in these species. As expected, transcription start sites (TSSs) of genes subject to XCI are hypermethylated in female mouse, and include the regions ~2.5 kb either side of TSSs. In female opossum, TSSs of X-borne genes subject to inactivation are not hypermethylated; rather, regions flanking TSSs are hypomethylated. Therefore, although absolute levels of DNA methylation of genes subject to XCI differ between eutherian and marsupial mammals, both produce uniform DNA methylation profiles across TSSs. Our data provide the first evidence of nonrandom differential DNA methylation of the X chromosome between a male and female representative marsupial.

## Results

Reduced representation bisulfite sequencing (RRBS) was used to measure male and female DNA methylation in mouse, opossum, platypus, and chicken liver samples. Profiles of absolute DNA methylation values were recorded, and male:female ratios calculated, with particular focus on the X (mammals) or Z (bird) chromosomes. We looked for regions of differential DNA methylation between the sexes, on the X or Z, which would indicate a role in sex chromosome gene silencing.

### Large Scale Differential DNA Methylation between the Sexes

Only CpG dinucleotides sampled in both sexes were retained for analysis, which were classified as mapping to an autosome or sex chromosome (supplementary table S1, Supplementary Material online). Large regions of differential methylation between the sexes were not evident on the autosomes in any species (fig. 1 and supplementary figs. S1 and S2, Supplementary Material online). In platypus, no net differential methylation was detected on any X chromosome (supplementary fig. S1, Supplementary Material online). This observation was mirrored in chicken, in which there was no net differential methylation observed on the Z chromosome between the sexes (supplementary fig. S1, Supplementary Material online).

Globally, the X chromosome in mouse had similar methylation levels between the sexes, although there were regions with a bias toward females (fig. 1). In opossum the X chromosome was globally hypermethylated in males compared with females (fig. 1), which contrasts with eutherians, and results from hypomethylation of the X in females (supplementary fig. S2, Supplementary Material online), known to be the Xi from immunofluorescence studies (Rens et al. 2010; Ingles and Deakin 2015).

### Differential DNA Methylation within Genomic Features

In both sexes, within an annotated genomic feature, reads at all sampled CpGs were scored as either bisulfite converted (nonmethylated), or not converted (methylated). The absolute level of methylation within a feature was calculated (across all sampled CpGs) as a proportion of methylated reads out of total read depth. Features were considered differentially methylated if there was a difference in absolute DNA methylation between the sexes of >15% and  $q$ -value <0.05.

The R package MethyKit (Akalın et al. 2012) was used to estimate DNA methylation within annotated genomic features, including: promoters (1 kb 5' of annotated TSSs), gene bodies, CpG islands, LINE1, and 300-kb tiles. These features were binned according to their location on an autosome or sex chromosome (an X in mammals or Z in chicken). In each species, and for all genomic features examined on autosomes, differential methylation was not biased toward either sex (fig. 2 and supplementary fig. S3, table S2, and data S1–S4, Supplementary Material online).

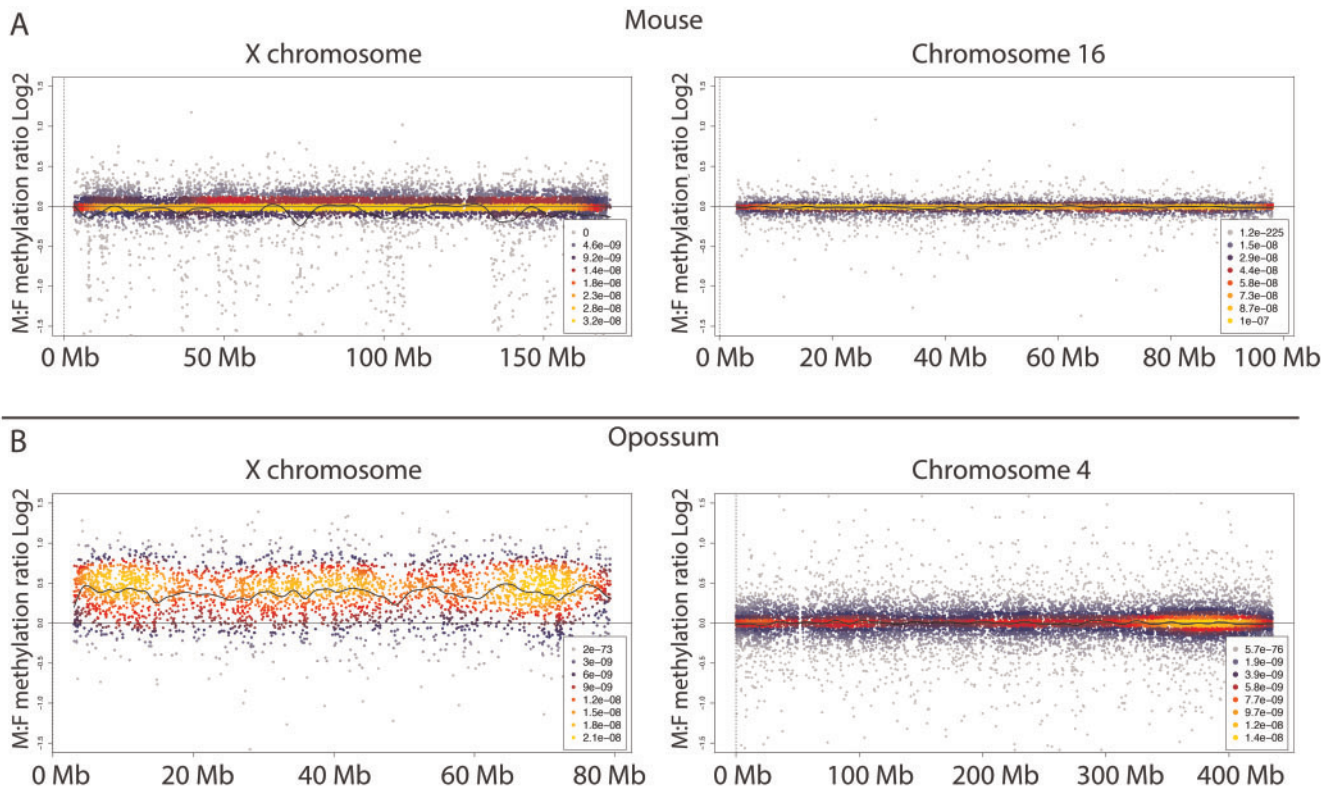

**Fig. 1.** Heatscatter plots of male to female DNA methylation ratios along the length of the X and a representative autosome for (A) mouse and (B) opossum. Each dot represents the M:F ratio within a 10-kb window on a log<sub>2</sub> scale. Above zero is higher methylation in males, below zero is higher methylation in females. Gray through to yellow represent increased local data density. Smoothed lines of best fit are black (see Materials and Methods).

There was no evidence that differential methylation of genomic features was biased toward either sex on the Xs in platypus, nor the Z chromosome in chicken (supplementary fig. S2, Supplementary Material online and table 1). However, as expected, in mouse, all features on the X chromosome were more often hypermethylated in females than in males. This was particularly evident for X-borne CpG islands that associate with promoters (i.e.,  $\pm 1$  kb of annotated TSSs), where 270 of 299 (90.3%) were hypermethylated in females relative to males (fig. 2, table 1, and supplementary data S1, Supplementary Material online), supporting previous observations that CpG island hypermethylation is important for eutherian XCI.

Genomic features on the opossum X chromosome were hypomethylated in females compared with males (fig. 2 and table 1), mirroring the global DNA methylation pattern (fig. 1). In females, 112 of the 255 (43.9%) 300-kb windows on the X were hypomethylated. This contrasted greatly with the putative regulatory CpG islands that associate with promoters, of which only 17 of 206 (8.3%) were hypomethylated in females (fig. 2, table 1, and supplementary data S2, Supplementary Material online). These observations are the first to demonstrate that the Xi is not uniformly demethylated in marsupials.

### DNA Methylation at TSSs

A metagene analysis was employed to examine the pattern of DNA methylation of different bins of promoters. For CpGs

$\pm 10$  kb of annotated TSSs, with a read depth of  $>8$  in both sexes, the percent methylation level was calculated. CpGs were binned according to location (X/Z chromosome or an autosome), expression (expressed or not expressed—data from Brawand et al. 2011), and XCI status (inactivated or escapee). For each bin DNA methylation levels were plotted for both sexes across TSSs with ggplot2 (Wickham 2009) using a generalized additive model regression line with 95% confidence intervals (see Materials and Methods).

Comparison of methylation at autosomal TSSs between the sexes was used to control for systemic biases between samples. For each species, DNA methylation at autosomal TSSs was equivalent between the sexes for both expressed (fig. 3A and B; supplementary fig. S4A, Supplementary Material online) and nonexpressed genes (supplementary figs. S5A and B and S4B, Supplementary Material online). In platypus and chicken, there was also no differential DNA methylation detected between males and females at TSSs on the sex chromosomes (supplementary fig. S4C and D, Supplementary Material online), suggesting against a role in gene silencing on the Xs in platypus or the Z in chicken.

The inactivation status of X genes has been reported for mouse brain, spleen, and ovary (Berletch et al. 2015), and that catalogue of mouse X-borne genes is adopted here. The TSSs of expressed genes subject to XCI were hypermethylated in females compared with males (fig. 3C). This contrasted with the subset of eight genes sampled in our data that escape XCI

**Table 1.** Proportion of X/Z Chromosome Features with >15% More Methylation in Either Male or Female and *q*-Value <0.05.

| Feature                  | Mouse    |          | Opossum  |        | Platypus |        | Chicken |        |
|--------------------------|----------|----------|----------|--------|----------|--------|---------|--------|
|                          | Male     | Female   | Male     | Female | Male     | Female | Male    | Female |
| 300-kb Tiles             | 0/559    | 19/559   | 112/255  | 0/255  | 2/284    | 4/284  | 11/275  | 6/275  |
| LINE1                    | 178/9268 | 292/9268 | 107/1118 | 0/1118 | 2/3492   | 4/3492 | 10/517  | 4/517  |
| Gene bodies              | 7/763    | 213/763  | 148/412  | 0/412  | 4/400    | 16/400 | 25/594  | 39/594 |
| Promoters                | 6/382    | 224/382  | 36/228   | 0/228  | 1/165    | 3/165  | 3/354   | 8/354  |
| CGIs                     | 2/411    | 329/411  | 52/416   | 1/416  | 15/896   | 12/896 | 8/646   | 15/646 |
| Orphan CGIs              | 2/133    | 80/133   | 35/219   | 0/219  | 14/773   | 12/773 | 6/283   | 11/283 |
| Promoter-associated CGIs | 0/299    | 270/299  | 17/206   | 2/206  | 1/124    | 0/124  | 2/419   | 5/419  |

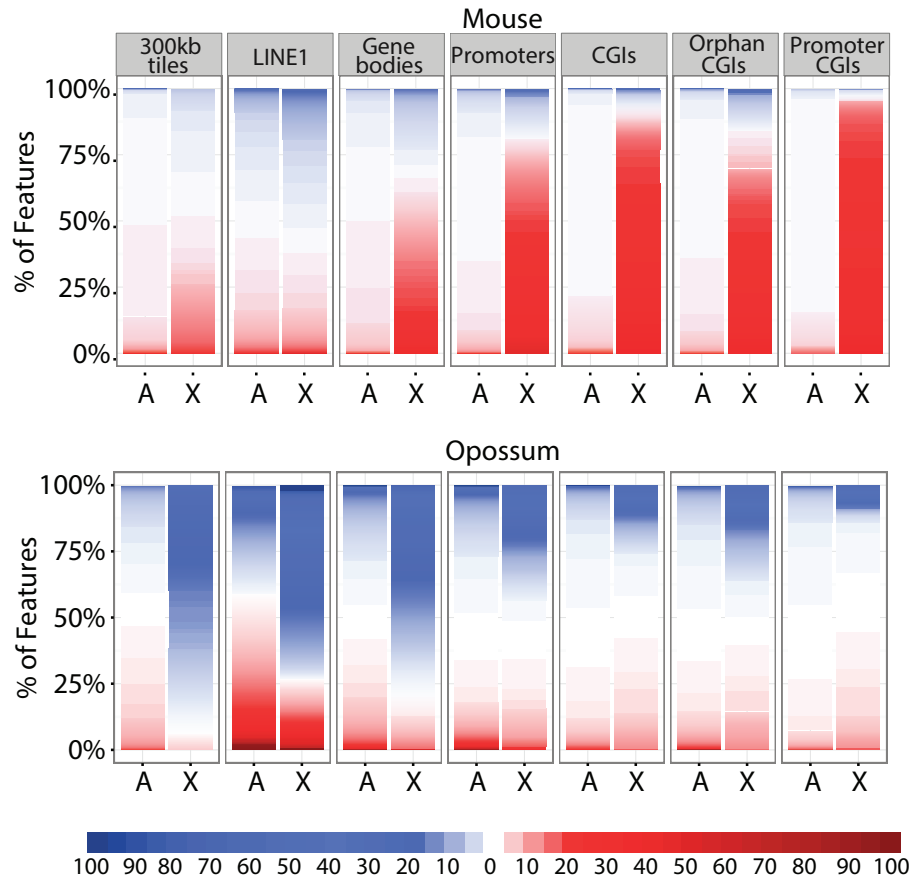**Fig. 2.** Differential DNA methylation between the sexes of annotated genomic features in mouse and opossum. For each feature, the left bar chart (A) represents features annotated on autosomes; the right bar chart (X) represents features annotated on the X. White represents equal methylation between the sexes. Darker shades of red indicate increasing DNA methylation in females. Darker shades of blue indicate increased DNA methylation in males. The scale is percentage DNA methylation difference between the sexes. Numbers of features sampled for each species are provided in supplementary table S4, Supplementary Material online. Plotted from data in supplementary data S1 and S2, Supplementary Material online.

in at least two of brain, spleen, and ovary (so likely escaping in liver too, from which our data were generated), where the DNA methylation difference between the sexes was <5% at the TSSs (supplementary fig. S6, Supplementary Material online). Using CpG DNA methylation levels in male as a measure for their methylation on the Xa in females, Xi DNA methylation level was inferred (see Materials and Methods). At TSSs of genes subject to inactivation, DNA methylation was 40% higher on Xi (fig. 3E—purple line) than on Xa (fig. 3C—blue line).

X-inactivation status in opossum has been determined for 174 of the 490 annotated protein coding X genes in brain, and 134 X genes in extra-embryonic membranes (Wang et al. 2014). Of these, the same 24 genes escaped XCI in both tissue types, with the remaining subject to silencing. Because the set of escaper genes is consistent between tissues, the inactivation status of X genes in brain was used to assign inactivation status of genes in liver for this study. We sampled 120 genes that were classified as subject to XCI (Wang et al. 2014). In male, 100 were expressed, and 20 were not expressed; whereas

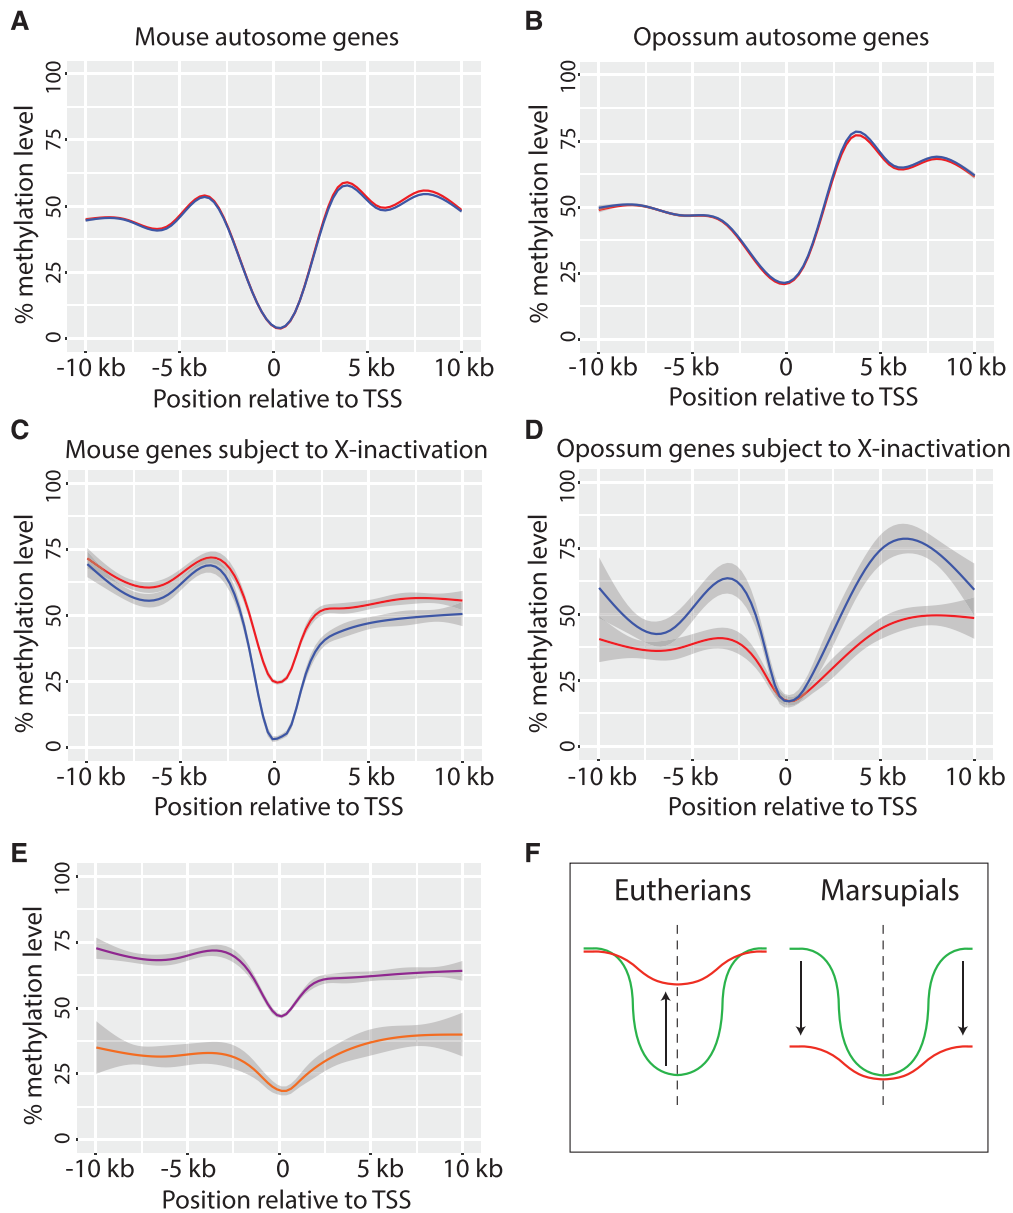

**Fig. 3.** DNA methylation levels of CpGs, sampled at a read depth  $>8$ ,  $\pm 10$  kb from annotated transcription start sites in mouse and opossum of all expressed genes on autosomes (A and B) and gene subject to XCI (C and D). Smoothed regression lines for best fit of CpG methylations levels are plotted for male (blue) and female (red) with 95% confidence intervals (gray shadowing). All genes are expressed in liver (expression data from Brawand et al. 2011). Individual methylation levels at each CpG are not plotted due to high density of data. The total number of CpGs sampled for the total number of TSSs (genes) are available in supplementary table S3, Supplementary Material online. (E) An estimation of DNA methylation levels (see Materials and Methods), across transcription start sites of expressed genes subject to XCI, on the Xi in mouse (purple) and opossum (orange). The methylation profiles on Xi are uniform compared with the Xa (represented by male methylation levels for X-borne TSSs—fig. 3C and D). (F) Model to depict a uniform DNA methylation profile across transcription start sites (TSSs) of gene subject to X inactivation in eutherians and marsupials. On the active X (green lines) the level of DNA methylation is relatively low at TSSs (dashed lines), which is flanked by high DNA methylation. On the inactive X (red lines) the difference in DNA methylation level between TSSs and flanking regions is reduced. In eutherians TSSs are hypermethylated to effect this, whereas in marsupials the flanking regions are hypomethylated.

in female 107 were expressed and 13 were not expressed (supplementary table S3, Supplementary Material online).

For expressed genes subject to XCI, we observed differential DNA methylation profiles between the sexes (fig. 3D). DNA methylation  $\pm 1$  kb from TSSs was the same in both sexes, but in females, regions flanking the TSS were hypomethylated. Approximately 3-kb upstream from TSSs of genes subject to XCI, DNA methylation was 20% lower in females.

Approximately 6-kb downstream TSSs of genes subject to XCI, DNA methylation was 30% lower in females. Across TSSs of genes that are subject to XCI, but which are not expressed, male and female DNA methylation patterns were overlapping (supplementary fig. S5D, Supplementary Material online). For the 21 genes we sampled that escape XCI, DNA methylation across TSSs was the same in both sexes (supplementary fig. S6, Supplementary Material online).

Importantly, observations of equal DNA methylation between the sexes at the TSS, and reduced flanking methylation in females were reflected in analyses of genes subject to XCI in an Australian marsupial (tamarin wallaby) (supplementary fig. S7, Supplementary Material online).

As with mouse, the CpG methylation levels on Xi were inferred from Xa methylation in male (see Materials and Methods). Approximately 3-kb upstream from TSSs of genes subject to XCI, DNA methylation was 30% lower on Xi (fig. 3E—orange line) than on Xa (fig. 3D—blue line); whereas ~6-kb downstream, DNA methylation was 40% lower on Xi than on Xa. As such, absolute DNA methylation levels on the Xi at TSSs of genes subject to XCI differed markedly between mouse and opossum, ranging from ~45% to 70% and ~20% to 40%, respectively (fig. 3E). However, in both species DNA methylation across the promoters of these genes was more uniform on Xi compared with the Xa, which we propose acts as a part of the epigenetic silencing signal on the X in both eutherian and marsupial mammals.

## Discussion

Here, we present RRBS data generated from liver DNA derived from male and female mouse, opossum, platypus, and chicken. In opossum there was no differential DNA methylation between males and females at TSSs of genes subject to XCI, whereas flanking regions were hypomethylated in females. Our data are the first to identify nonrandom differential DNA methylation between the sexes of genes subject to XCI in marsupials.

No differential DNA methylation was detected between the sexes on the chicken Z, or any of the X chromosomes in platypus (fig. 1). Frustratingly, only 437 Mb of the 1.84 Gb of assembled platypus sequence is anchored to chromosomes (Warren et al. 2008), which greatly reduced the number of genes that could be analyzed. Improved assemblies will enable tabulation of genomic features and promoters located on specific X chromosomes, rather than examining all Xs as one. For instance, our current analysis is limited because we cannot partition loci to  $X_5$  (the oldest X) and  $X_1$  (the youngest X), which may differ in DNA methylation profile. Notwithstanding these limitations, we conclude that there is no differential DNA methylation between the sexes on the Z chromosome in chicken, or across all the X chromosomes in platypus, precluding an obvious role in sex chromosome gene silencing.

As expected, in female mice there was hypermethylation of the X at CpG islands associated with promoters (fig. 2 and table 1). Hypermethylation was also observed at TSSs of expressed genes subject to XCI (fig. 3C), whereas genes that escape XCI displayed no differential DNA methylation between the sexes near TSSs (supplementary fig. S6, Supplementary Material online). In addition to validating our pipeline, this observation accords with previous findings of hypermethylated promoters, which negatively regulate gene expression and contributes to the maintenance of eutherian XCI (Escamilla-Del-Arenal et al. 2011).

The pattern of DNA methylation on the marsupial X chromosome and its role in XCI has been investigated for many years. Differential DNA methylation between the sexes of X-borne gene promoters has not been observed in female marsupials (Kaslow and Migeon 1987; Loebel and Johnston 1996; Hornecker et al. 2007; Wang et al. 2014), which contrasts immunofluorescence evidence that demonstrates the Xi is globally hypomethylated in marsupials (Rens et al. 2010; Ingles and Deakin 2015); an unexpected observation considering that hypermethylation correlates with transcriptional silencing. General consensus in the literature has been that DNA methylation does not play an obvious role in marsupial XCI (Cooper et al. 1993). Differential DNA methylation was previously detected in the *Rsx* promoter (Wang et al. 2014); however, we did not sample the *Rsx* promoter in our RRBS data.

Differential DNA methylation between the sexes is only observed near TSSs of expressed genes that are subject XCI, so correlates perfectly with XCI. Close inspection of 20-kb windows at TSSs of expressed genes subject to XCI established no differential DNA methylation between the sexes at TSSs. However, differential DNA methylation between the sexes was detected in regions that flank TSSs. In contrast, genes that escape XCI and genes subject to XCI, but not expressed, had no differential methylation between the sexes across their TSSs.

The patterns observed in opossum were consistent to those we observed for a limited number of genes in tamarin wallaby brain, liver, spleen, and cultured fibroblasts. Additionally, in common wallaroo (*Macropus robustus*) blood, CpGs in the gene body of *Hprt* were hypomethylated on the Xi (Piper et al. 1993). And in *Didelphis virginiana* liver, heart, and brain, hypomethylation on the Xi was observed in the gene body of *G6pd* (Kaslow and Migeon 1987). These observations suggest that hypomethylation flanking TSSs on the inactive X is consistent across different marsupial species and tissues.

Mounting evidence suggests that the spatial distribution of methylated cytosines across promoters correlates with gene expression levels, rather than average methylation across entire promoters. Low DNA methylation at TSSs, flanked by higher DNA methylation (a U-shaped profile), correlates with increased gene expression (Vanderkraats et al. 2013; Edgar et al. 2014; Kapourani and Sanguinetti 2016). A profile of uniform DNA methylation across TSSs, irrespective of absolute level, correlates with reduced gene expression (Kapourani and Sanguinetti 2016). Unique to our analysis is the observation of differential “flattening” (between the sexes) of the DNA methylation profile at TSSs for genes subject to XCI, in both mouse and opossum (fig. 3C and D). We propose that the flattening acts as part of the epigenetic machinery to maintain silence of genes on the X chromosome in all therian mammals.

Although genes subject to XCI in eutherian and marsupial mammals share a common distribution of DNA methylation across promoters, there is a stark difference between the strategies by which this is achieved. In eutherians the level of DNA methylation is rendered more uniform across the

promoter by hypermethylation at TSSs, whereas in marsupials, hypomethylation of regions flanking TSSs achieves the same outcome. In both groups, the difference in DNA methylation between males and females (whether it be at TSSs in mouse or flanking TSSs in opossum) remains consistent at ~20% (fig. 3C and D).

Superficially, our observations contrast those reported in the literature; but, our data do remain consistent with previous observations. We demonstrated global hypomethylation of the X chromosome in females, as previously observed (Rens et al. 2010; Ingles and Deakin 2015). However, we also observe an equal level of DNA methylation (~20%) in both sexes at TSSs of genes subject to XCI (fig. 3D). Previous work (Kaslow and Migeon 1987; Loebel and Johnston 1996; Hornecker et al. 2007; Wang et al. 2014) examining promoter DNA methylation on the X in marsupials did not detect differential methylation between sexes because regions immediately upstream of TSSs were examined. We demonstrate that no differential methylation is detected until >1-kb upstream of TSSs.

This study provides a comprehensive between sex analysis of DNA methylation patterns on the sex chromosomes in representative amniote vertebrates. Our data suggest that a uniform distribution of DNA methylation across TSSs of genes subject to XCI is common in both eutherian and marsupial mammals. Surprisingly, in marsupials DNA methylation is low across these TSSs, whereas in eutherians DNA methylation is high.

## Materials and Methods

### Ethics and Samples

All animal experiments were approved by the Australian National University Animal Experimentation Ethics Committee (approval number R.CG.14.08) and the Garvan/St Vincents Animal Ethics Committee (#13/35).

Liver samples of 8-day-old male and female chicks (*Gallus gallus*), adult platypus (*Ornithorhynchus anatinus*), adult opossum (*Monodelphis domestica*), and adult mouse (*Mus musculus*) were collected fresh and snap frozen. Male and female tammar wallaby (*Macropus eugenii*) brain, liver, and spleen were also collected and snap frozen, and primary fibroblast cell cultures were established from ear clips of the same individuals. One male and one female was available for chick, platypus, opossum, and tammar wallaby. Six males and six females were available for mouse. Genomic DNA was isolated with the DNeasy Blood & Tissue Kit (QIAGEN). DNA quality was evaluated by agarose gel electrophoresis and spectrophotometer.

### Sequenom MassARRAY EpiTYPER Analysis

Tammar wallaby DNA methylation was examined for four X-borne genes using the Sequenom MassArray EpiTYPER (Sequenom, San Diego, CA) as previously described (Novakovic et al. 2011). Primers (supplementary table S5, Supplementary Material online) were designed using Agena Bioscience's EpiDesigner software (<http://www.epidesigner.com>; last accessed November 24, 2017). PCR amplification

was performed after bisulfite conversion of genomic DNA with the Qiagen EpiTect Bisulfite kit (Qiagen, Australia) according to the manufacturer's instructions. All PCR amplifications, and downstream processing, were carried out in triplicate.

### Reduced Representation Bisulfite Sequencing

Reduced representation bisulfite sequencing (RRBS) was conducted by Zymo research. Briefly, libraries were prepared from 200 to 500 ng genomic DNA digested with 60 units of TaqI and 30 units of MspI (NEB) sequentially. Size-selected TaqI-MspI fragments (40–120 and 120–350 bp) were filled in and 3'-terminal-A extended, extracted with DNA Clean & Concentrator-5 kit (Zymo Research). Ligation to preannealed adapters containing 5'-methyl-cytosine instead of cytosine was performed using the Illumina DNA preparation kit and protocol. Purified, adaptor ligated fragments were bisulphite-treated using the EZ DNA Methylation-Direct Kit (Zymo Research). Preparative-scale PCR was performed and purified DNA PCR products were subjected to a final size selection on a 4% NuSieve 3:1 agarose gel. SYBR-green-stained gel slices containing adaptor-ligated fragments of 130–210 or 210–460 bp in size were excised. Library material was recovered from the gel (Zymoclean Gel DNA Recovery Kit) and sequenced on an Illumina HiSeq genome analyzer.

Mouse liver RRBS data have been deposited in the NCBI Gene Expression Omnibus under accession number GSE84573. Opossum, platypus, and chicken liver RRBS data are available in the NCBI short read archive under BioProject PRJNA356776.

### RRBS Data Analysis

All fastq files were filtered with Trimmomatic-0.30 (Bolger et al. 2014) with the option SLIDINGWINDOW: 5:15. Paired forward and reverse reads were mapped to respective indexed genomes with bismark\_v0.9.0 (<http://www.bioinformatics.babraham.ac.uk/projects/bismark/>; last accessed November 24, 2017) using the following options: `-non-directional -bowtie2 -D 20 -R 3 -N 0 -L 20`.

Sorted SAM files were read into the R package MethyKit (Akalin et al. 2012) with the `read.bismark` command. Read context was set to CpG, minimum coverage set to 1, and minimum quality set to 20. The command `filterByCoverage` was used to create an object of bases with coverage of at least one, and a second object of bases with coverage of at least nine. Both were normalized with the command `normalizeCoverage`. Normalized objects with coverage of at least one were used for estimations of methylation within genomic features (e.g., LINE1, gene bodies, and windowed analysis). Normalized objects with coverage of at least nine were used to estimate methylation of specific CpG dinucleotides in both sexes.

Male:female DNA methylation ratios were calculated within 10- and 300-kb sliding windows with the `tileMethylCounts` command in `methyKit`. These ratios were used for circos plots (300-kb windows) and linear plots (10-kb windows). The `regionCounts` command in `methyKit` was used to calculate methylation values in each sex for

annotated LINE1, gene bodies, promoters (i.e., 1-kb upstream of annotated TSSs), and CpG islands. Male:female ratios were calculated from these values.

Circos plots were created with RCircos (Zhang et al. 2013). The RCircos.Histogram.Plot function was used to plot absolute DNA methylation levels within 300-kb windows (see above) for both male and female. The 10 kb windowed heat-catter plots were plotted with the R package LSD.

For metagene analysis of DNA methylation levels at TSSs, male and female methylation values were calculated at CpG dinucleotids ( $\pm 10$  kb from TSSs) with a read depth of  $>8$  (in both sexes). Genes on the X chromosome in mouse and opossum were binned into those that escaped XCI, and those subject to XCI (both expressed and not expressed). Bins were also generated for expressed and nonexpressed autosomal genes in each species. For each bin DNA methylation levels were plotted around TSSs with the R package ggplot2 (Wickham 2009). A generalized additive model with default smoothing (cubic smoothing spline) was used with the predict function in R to fit a regression line with 95% confidence intervals.

Analysis of TSSs in single mouse male and female pairs (supplementary fig. S8A–D, Supplementary Material online) resulted in almost identical curves to those observed for the six male and six female replicates combined, validating the use of single replicates in the other species. DNA methylation across TSSs was also analyzed using publically available mouse whole genome bisulfite sequencing (WGBS) data for male and female (Cole et al. 2017). DNA methylation at TSSs of autosomal genes were identical between the sexes (supplementary fig. S8E, Supplementary Material online), whereas DNA methylation at TSSs of genes subject to XCI was increased in female (supplementary fig. S8F, Supplementary Material online), validating the patterns observed in the RRBS data.

For each CpG associated with genes subject to XCI, the DNA methylation level in male (with a single active X) was used as a measure of DNA methylation level on X<sub>a</sub> in female. In female, the total methylation level measures both the X<sub>a</sub> and X<sub>i</sub>. Therefore, the level of CpG DNA methylation on X<sub>i</sub> was estimated by: 1) Calculating the difference of DNA methylation between sexes at each CpG by subtracting the male methylation value from the female. 2) Adding this value to the female methylation value. A generalized additive model regression line with 95% confidence intervals was plotted with ggplot2 as above.

## Supplementary Material

Supplementary data are available at *Molecular Biology and Evolution* online.

## Acknowledgments

This work was funded by Australian Research Council Discovery Projects DP0987091 and DP1094868.

## References

- Akalin A, Kormaksson M, Li S, Garrett-Bakelman FE, Figueroa ME, Melnick A, Mason CE. 2012. methylKit: a comprehensive R package for the analysis of genome-wide DNA methylation profiles. *Genome Biol.* 13(10):R87.
- Al Nadaf S, Deakin JE, Gilbert C, Robinson TJ, Graves JA, Waters PD. 2012. A cross-species comparison of escape from X inactivation in Eutheria: implications for evolution of X chromosome inactivation. *Chromosoma* 121(1):71–78.
- Al Nadaf S, Waters PD, Koina E, Deakin JE, Jordan KS, Graves JA. 2010. Activity map of the tammar X chromosome shows that marsupial X inactivation is incomplete and escape is stochastic. *Genome Biol.* 11(12):R122.
- Augui S, Nora EP, Heard E. 2011. Regulation of X-chromosome inactivation by the X-inactivation centre. *Nat Rev Genet.* 12(6):429–442.
- Berlitch JB, Ma W, Yang F, Shendure J, Noble WS, Disteche CM, Deng X. 2015. Escape from X inactivation varies in mouse tissues. *PLoS Genet.* 11(3):e1005079.
- Bolger AM, Lohse M, Usadel B. 2014. Trimmomatic: a flexible trimmer for Illumina sequence data. *Bioinformatics* 30(15):2114–2120.
- Brawand D, Soumillon M, Necsulea A, Julien P, Csardi G, Harrigan P, Weier M, Liechti A, Aximu-Petri A, Kircher M, et al. 2011. The evolution of gene expression levels in mammalian organs. *Nature* 478(7369):343–348.
- Chaumeil J, Waters PD, Koina E, Gilbert C, Robinson TJ, Graves JA. 2011. Evolution from XIST-independent to XIST-controlled X-chromosome inactivation: epigenetic modifications in distantly related mammals. *PLoS One* 6(4):e19040.
- Chu C, Zhang QC, da Rocha ST, Flynn RA, Bharadwaj M, Calabrese JM, Magnuson T, Heard E, Chang HY. 2015. Systematic discovery of Xist RNA binding proteins. *Cell* 161(2):404–416.
- Cole JJ, Robertson NA, Rather MI, Thomson JP, McBryan T, Sproul D, Wang T, Brock C, Clark W, Ideker T, et al. 2017. Diverse interventions that extend mouse lifespan suppress shared age-associated epigenetic changes at critical gene regulatory regions. *Genome Biol.* 18(1):58.
- Cooper DW, Johnston PG, Watson JM, Graves JAM. 1993. X inactivation in marsupials and monotremes. *Semin Dev Biol.* 4(2):117–128.
- Deakin JE, Hore TA, Koina E, Marshall Graves JA. 2008. The status of dosage compensation in the multiple X chromosomes of the platypus. *PLoS Genet.* 4(7):e1000140.
- Duret L, Chureau C, Samain S, Weissenbach J, Avner P. 2006. The Xist RNA gene evolved in eutherians by pseudogenization of a protein-coding gene. *Science* 312(5780):1653–1655.
- Edgar R, Tan PP, Portales-Casamar E, Pavlidis P. 2014. Meta-analysis of human methylomes reveals stably methylated sequences surrounding CpG islands associated with high gene expression. *Epigenet Chromatin* 7(1):28.
- Escamilla-Del-Arenal M, da Rocha ST, Heard E. 2011. Evolutionary diversity and developmental regulation of X-chromosome inactivation. *Hum Genet.* 130(2):307–327.
- Grant J, Mahadevaiah SK, Khil P, Sangrithi MN, Royo H, Duckworth J, McCarrey JR, VandeBerg JL, Renfree MB, Taylor W, et al. 2012. Rxsx is a metatherian RNA with Xist-like properties in X-chromosome inactivation. *Nature* 487(7406):254–258.
- Graves JAM. 1982. 5-azacytidine-induced re-expression of alleles on the inactive X chromosome in a hybrid mouse cell line. *Exp Cell Res.* 141(1):99–105.
- Grützner F, Rens W, Tsend-Ayush E, El-Mogharbel N, O'Brien PC, Jones RC, Ferguson-Smith MA, Graves JAM. 2004. In the platypus a meiotic chain of ten sex chromosomes shares genes with the bird Z and mammal X chromosomes. *Nature* 432(7019):913–917.
- Hore TA, Koina E, Wakefield MJ, Marshall Graves JA. 2007. The region homologous to the X-chromosome inactivation centre has been disrupted in marsupial and monotreme mammals. *Chromosome Res.* 15(2):147–161.
- Hornecker JL, Samollow PB, Robinson ES, Vandeberg JL, McCarrey JR. 2007. Meiotic sex chromosome inactivation in the marsupial *Monodelphis domestica*. *Genesis* 45(11):696–708.



- Ingles ED, Deakin JE. 2015. Global DNA Methylation patterns on marsupial and devil facial tumour chromosomes. *Mol Cytogenet.* 8:74.
- Itoh Y, Kampf K, Arnold AP. 2011. Possible differences in the two Z chromosomes in male chickens and evolution of MHM sequences in Galliformes. *Chromosoma* 120(6):587–598.
- Jones PA. 2012. Functions of DNA methylation: islands, start sites, gene bodies and beyond. *Nat Rev Genet.* 13(7):484–492.
- Kapourani CA, Sanguinetti G. 2016. Higher order methylation features for clustering and prediction in epigenomic studies. *Bioinformatics* 32(17):i405–i412.
- Kaslow DC, Migeon BR. 1987. DNA methylation stabilizes X chromosome inactivation in eutherians but not in marsupials: evidence for multistep maintenance of mammalian X dosage compensation. *Proc Natl Acad Sci U S A.* 84(17):6210–6214.
- Li J, Li R, Wang Y, Hu X, Zhao Y, Li L, Feng C, Gu X, Liang F, Lamont SJ, et al. 2015. Genome-wide DNA methylome variation in two genetically distinct chicken lines using MethylC-seq. *BMC Genomics* 16:851.
- Li Q, Li N, Hu X, Li J, Du Z, Chen L, Yin G, Duan J, Zhang H, Zhao Y, et al. 2011. Genome-wide mapping of DNA methylation in chicken. *PLoS One* 6(5):e19428.
- Livernois AM, Waters SA, Deakin JE, Marshall Graves JA, Waters PD. 2013. Independent evolution of transcriptional inactivation on sex chromosomes in birds and mammals. *PLoS Genet.* 9(7):e1003635.
- Lock LF, Melton DW, Caskey CT, Martin GR. 1986. Methylation of the mouse hprt gene differs on the active and inactive X chromosomes. *Mol Cell Biol.* 6(3):914–924.
- Lock LF, Takagi N, Martin GR. 1987. Methylation of the Hprt gene on the inactive X occurs after chromosome inactivation. *Cell* 48(1):39–46.
- Loebel DA, Johnston PG. 1996. Methylation analysis of a marsupial X-linked CpG island by bisulfite genomic sequencing. *Genome Res.* 6(2):114–123.
- Mahadevaiah SK, Royo H, VandeBerg JL, McCarrey JR, Mackay S, Turner JM. 2009. Key features of the X inactivation process are conserved between marsupials and eutherians. *Curr Biol.* 19(17):1478–1484.
- McHugh CA, Chen CK, Chow A, Surka CF, Tran C, McDonel P, Pandya-Jones A, Blanco M, Burghard C, Moradian A, et al. 2015. The Xist lncRNA interacts directly with SHARP to silence transcription through HDAC3. *Nature* 521(7551):232–236.
- Minajigi A, Froberg JE, Wei C, Sunwoo H, Kesner B, Colognori D, Lessing D, Payer B, Boukhali M, Haas W, et al. 2015. Chromosomes. A comprehensive Xist interactome reveals cohesin repulsion and an RNA-directed chromosome conformation. *Science* 349(6245):282.
- Mohandas T, Sparkes RS, Shapiro LJ. 1981. Reactivation of an inactive human X chromosome: evidence for X inactivation by DNA methylation. *Science* 211(4480):393–396.
- Norris DP, Brockdorff N, Rastan S. 1991. Methylation status of CpG-rich islands on active and inactive mouse X chromosomes. *Mamm Genome* 1(2):78–83.
- Novakovic B, Gordon L, Wong NC, Moffett A, Manuelpillai U, Craig JM, Sharkey A, Saffery R. 2011. Wide-ranging DNA methylation differences of primary trophoblast cell populations and derived cell lines: implications and opportunities for understanding trophoblast function. *Mol Hum Reprod.* 17(6):344–353.
- Piper AA, Bennett AM, Noyce L, Swanton MK, Cooper DW. 1993. Isolation of a clone partially encoding hill kangaroo X-linked hypoxanthine phosphoribosyltransferase: sex differences in methylation in the body of the gene. *Somat Cell Mol Genet.* 19(2):141–159.
- Rens W, O'Brien PC, Grutzner F, Clarke O, Graphodatskaya D, Tsend-Ayush E, Trifonov VA, Skelton H, Wallis MC, Johnston S, et al. 2007. The multiple sex chromosomes of platypus and echidna are not completely identical and several share homology with the avian Z. *Genome Biol.* 8(11):R243.
- Rens W, Wallduck MS, Lovell FL, Ferguson-Smith MA, Ferguson-Smith AC. 2010. Epigenetic modifications on X chromosomes in marsupial and monotreme mammals and implications for evolution of dosage compensation. *Proc Natl Acad Sci U S A.* 107(41):17657–17662.
- Teranishi M, Shimada Y, Hori T, Nakabayashi O, Kikuchi T, Macleod T, Pym R, Sheldon B, Solovei I, Macgregor H, et al. 2001. Transcripts of the MHM region on the chicken Z chromosome accumulate as non-coding RNA in the nucleus of female cells adjacent to the DMRT1 locus. *Chromosome Res.* 9:147–165.
- Tribioli C, Tamanini F, Patrosso C, Milanese L, Villa A, Pergolizzi R, Maestrini E, Rivella S, Bione S, Mancini M. 1992. Methylation and sequence analysis around Eagl sites: identification of 28 new CpG islands in XQ24-XQ28. *Nucleic Acids Res.* 20(4):727–733.
- Vanderkraats ND, Hiken JF, Decker KF, Edwards JR. 2013. Discovering high-resolution patterns of differential DNA methylation that correlate with gene expression changes. *Nucleic Acids Res.* 41(14):6816–6827.
- Veyrunes F, Waters PD, Miethke P, Rens W, McMillan D, Alsop AE, Grutzner F, Deakin JE, Whittington CM, Schatzkamer K, et al. 2008. Bird-like sex chromosomes of platypus imply recent origin of mammal sex chromosomes. *Genome Res.* 18(6):965–973.
- Wang X, Douglas KC, Vandeberg JL, Clark AG, Samollow PB. 2014. Chromosome-wide profiling of X-chromosome inactivation and epigenetic states in fetal brain and placenta of the opossum, *Monodelphis domestica*. *Genome Res.* 24(1):70–83.
- Warren WC, Hillier LW, Marshall Graves JA, Birney E, Ponting CP, Grutzner F, Belov K, Miller W, Clarke L, Chinwalla AT, et al. 2008. Genome analysis of the platypus reveals unique signatures of evolution. *Nature* 453(7192):175–183.
- Wickham H. 2009. ggplot2: elegant graphics for data analysis. New York: Springer Publishing Company, Incorporated.
- Yang X, Deng J, Zheng J, Xia L, Yang Z, Qu L, Chen S, Xu G, Jiang H, Clinton M, et al. 2016. A window of MHM demethylation correlates with key events in gonadal differentiation in the chicken. *Sex Dev.* 10(3):152–158.
- Zhang H, Meltzer P, Davis S. 2013. RCircos: an R package for Circos 2D track plots. *BMC Bioinformatics* 14:244.
